# Supplementary material
Source: PubMed Central journal article supplement (PMC2648296)

***Glutathione-S-Transferase M1 and P1 Prevent Aggravation of Allergic  
Responses by Secondhand Smoke***

Frank D. Gilliland, M.D., Ph.D., Yu-Fen Li, Ph.D., Henry Gong, Jr., M.D.,

David Diaz-Sanchez, Ph.D.

ONLINE DATA SUPPLEMENT

## ONLINE REFERENCES

E1. Gilliland FD, Li YF, Saxon A, Diaz-Sanchez D. Effect of glutathione-S-transferase M1 and P1 genotypes on xenobiotic enhancement of allergic responses: randomised, placebo-controlled crossover study. *Lancet* 2004; 363:119-125.

## FIGURE LEGENDS

Figure E1. Nasal allergen-specific IgE, IL-4, histamine and IFN- $\gamma$  response post clean air plus allergen and SHS plus allergen by *GSTM1* genotype

Legend: x *GSTM1* null    o *GSTM1* present

Figure E2. Nasal allergen-specific IgE, IL-4, histamine and IFN- $\gamma$  response post clean air plus allergen and SHS plus allergen by *GSTP1* genotype

Legend: x *GSTP1*(Ile/Val)    o *GSTP1* (Ile/Ile)

Figure E3. Effects of *GSTM1* genotype on differences ( $\Delta$ ) in nasal allergic responses between clean air plus allergen and secondhand smoke (SHS)/DEP exposure plus allergen (level after secondhand smoke (SHS)/DEP exposure plus allergen minus level after clean air plus allergen). The data concerning DEP have been published previously (E1).

Figure E4. Effects of *GSTP1* genotype on differences ( $\Delta$ ) in nasal allergic responses between clean air plus allergen and secondhand smoke (SHS)/DEP exposure plus allergen (level after secondhand smoke (SHS)/DEP exposure plus

allergen minus level after clean air plus allergen). The data concerning DEP have been published previously (E1).

Table E1. Nasal allergen-specific histamine and IFN- $\gamma$  response post clean air or SHS\*

|        | Histamine (nM) |      |                          | IFN- $\gamma$ (ng/L) |      |                          |
|--------|----------------|------|--------------------------|----------------------|------|--------------------------|
|        | Placebo        | SHS  | differences ( $\Delta$ ) | Placebo              | SHS  | differences ( $\Delta$ ) |
| Mean   | 0.73           | 0.64 | -0.09                    | 0.93                 | 0.95 | 0.02                     |
| Median | 0.58           | 0.62 | -0.06                    | 0.71                 | 0.84 | 0.05                     |

\*Allergen specific IgE and IL-4 were below the limits of detections

Figure E1.

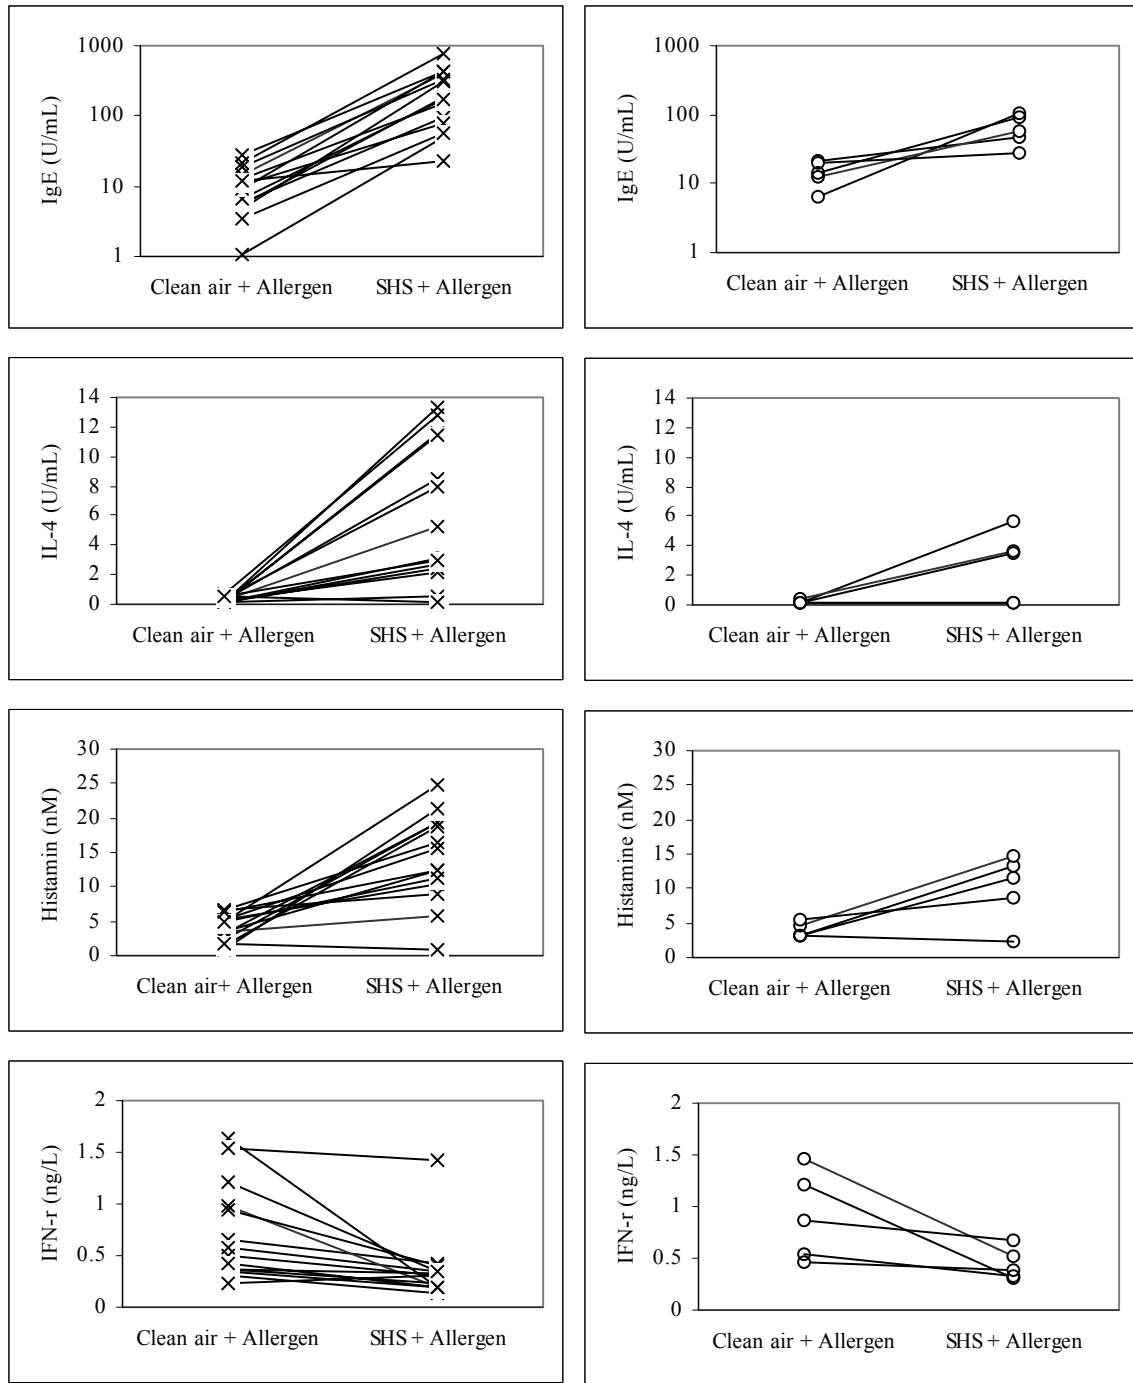

Legend: x *GSTM1* null    o *GSTM1* present

Figure E2.

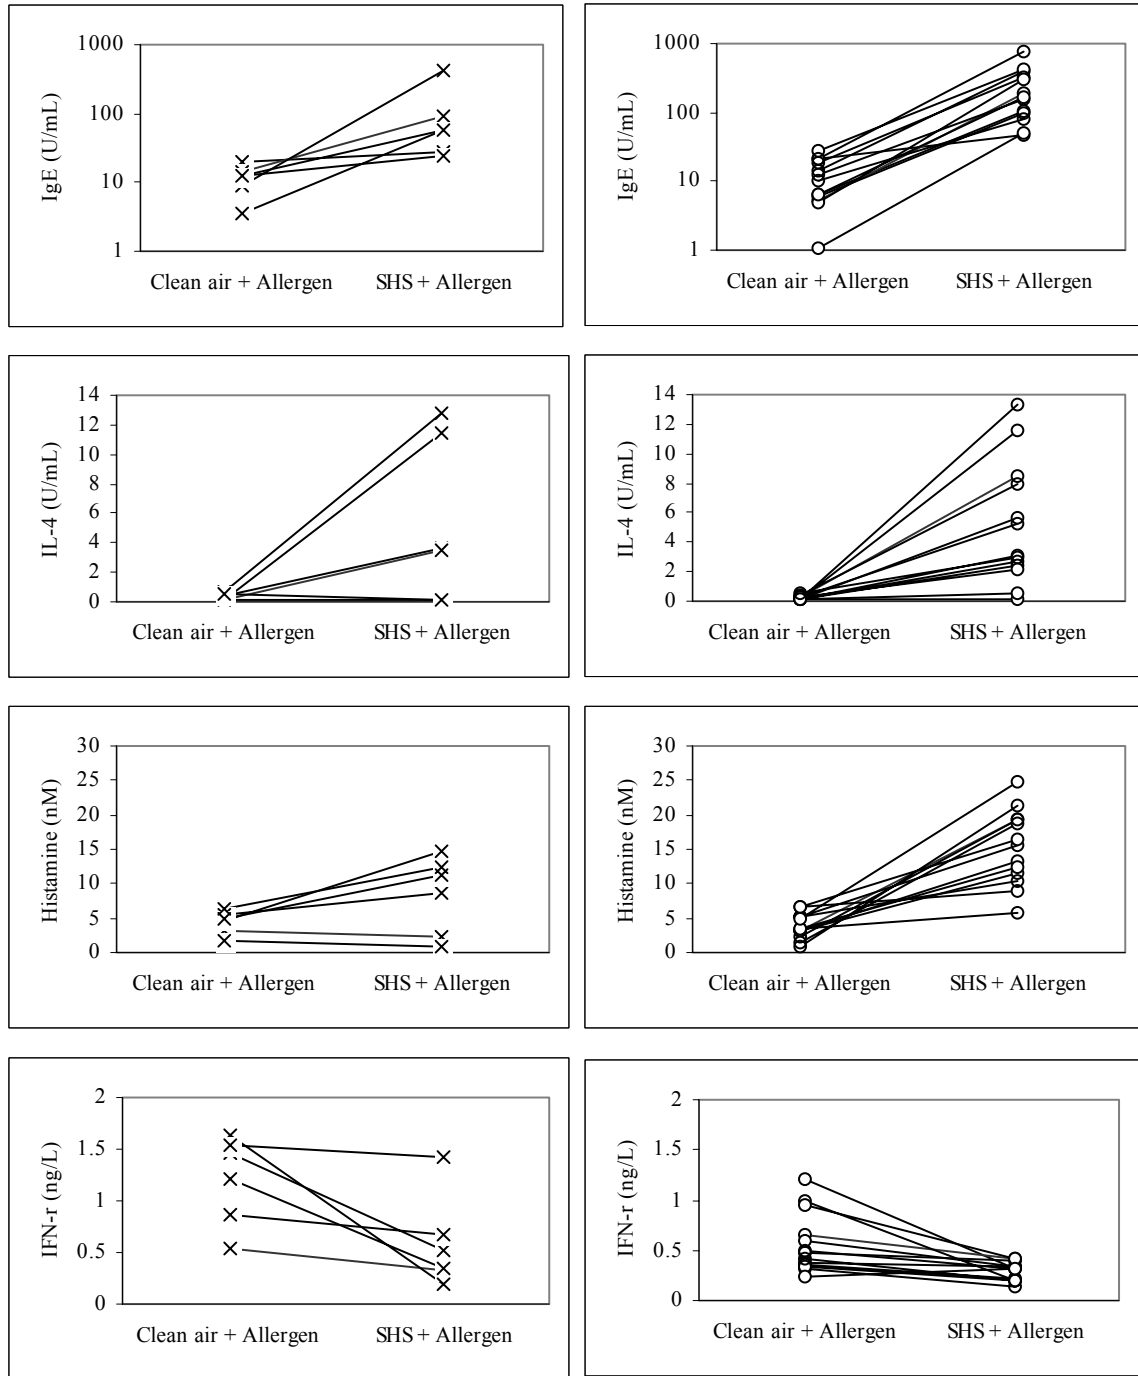

Legend: x *GSTP1(Ile/Val)*    o *GSTP1(Ile/Ile)*

Figure E3.

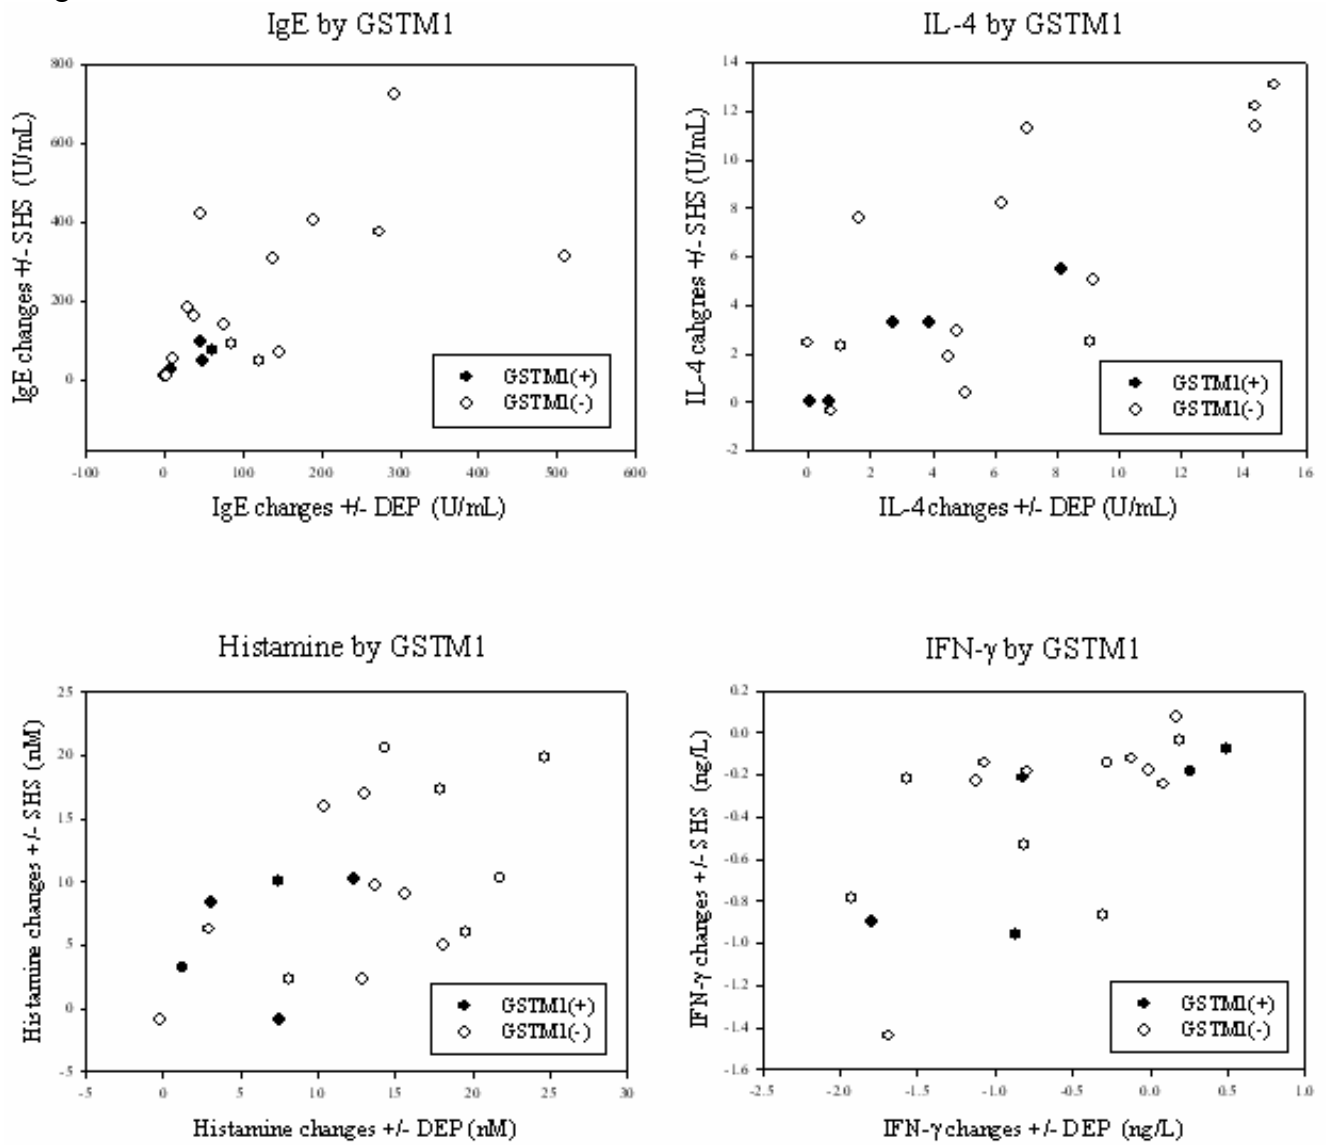

Figure E4.

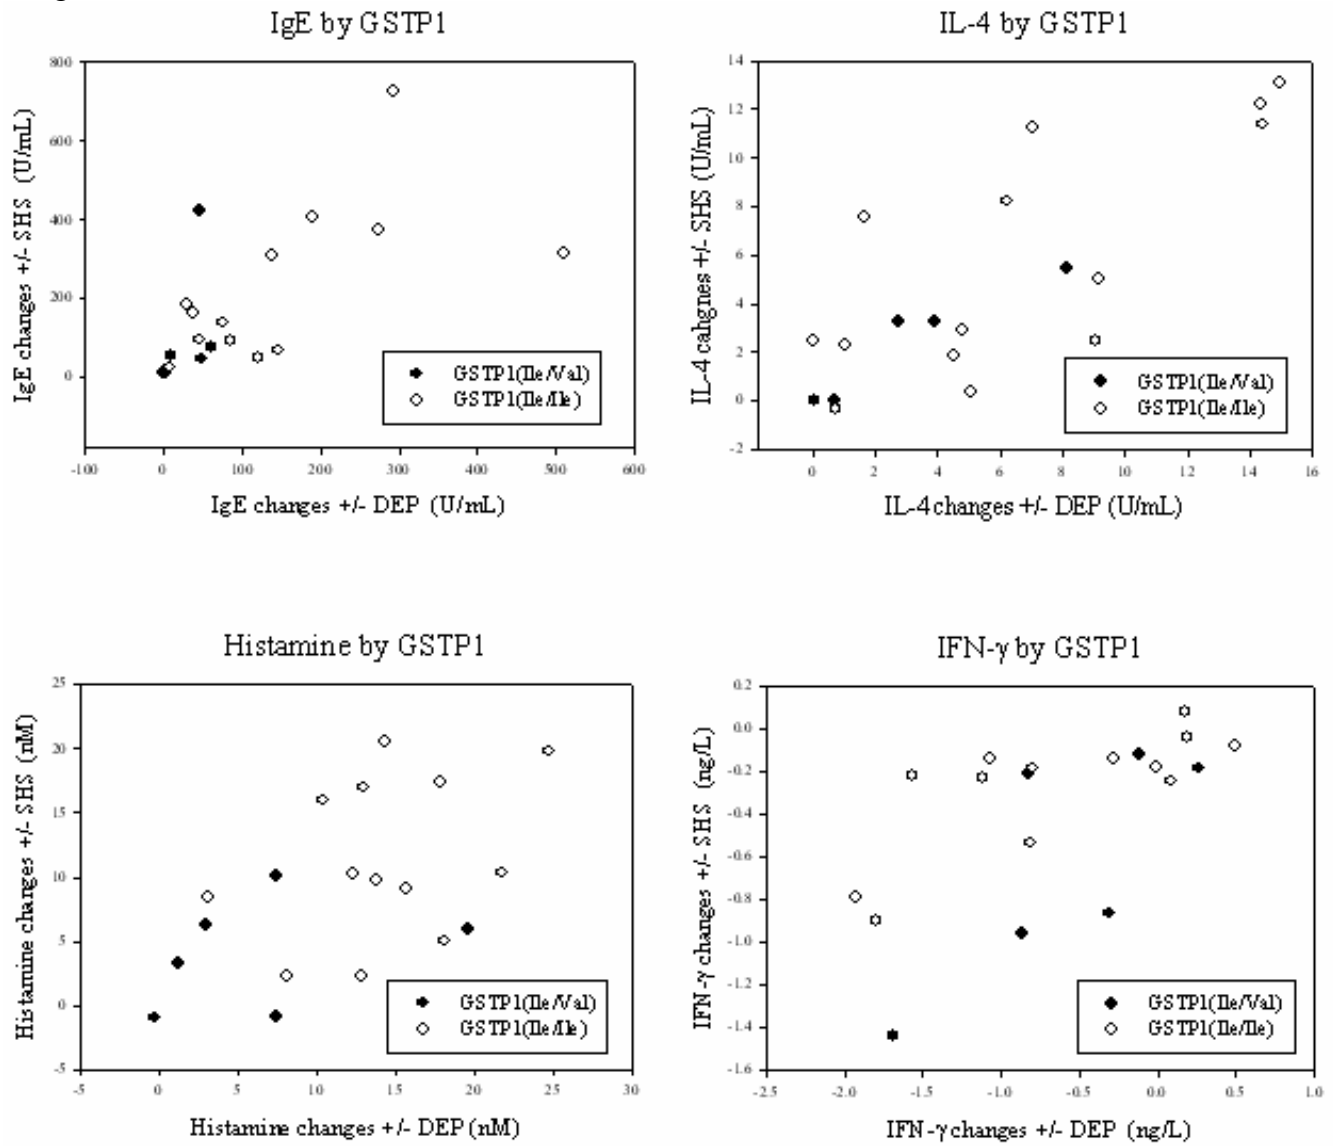

Supplement: supp_174_12_1335__1.pdf [file supp_174_12_1335__1.pdf]
